# Supplementary material for: Prognostic value of baseline and early treatment response of neutrophil-lymphocyte ratio, C-reactive protein, and lactate dehydrogenase in non-small cell lung cancer patients undergoing immunotherapy
Source: PubMed Central journal article supplement — Transl Lung Cancer Res. 2023 Jul 14;12(7):1506–16. doi: 10.21037/tlcr-23-7 (PMC10413036; doi:10.21037/tlcr-23-7), 2023-07-14
Supplement: tlcr-12-07-1506-supplementary.pdf [file tlcr-12-07-1506-supplementary.pdf]

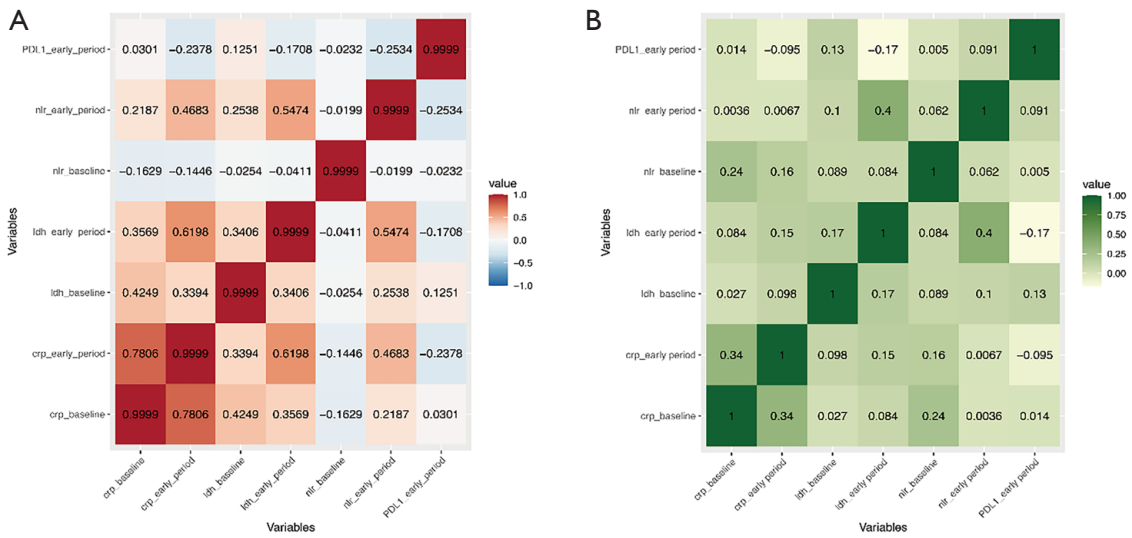

**Figure S1** Correlations in the NLR, CRP, LDH and PD-L1 before immunotherapy prescription. (A) Correlation plot for categorized variables. (B) Correlation plot for continuous variables. NLR, neutrophil-lymphocyte ratio; CRP, C-reactive protein, LDH, lactate dehydrogenase; PD-L1, programmed cell death ligand 1.

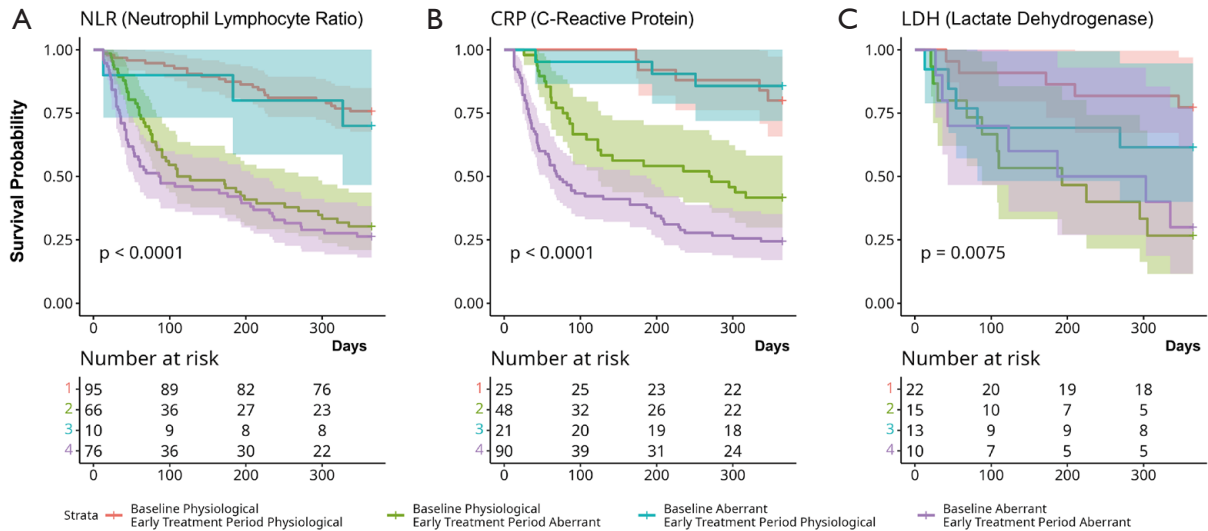

**Figure S2** Kaplan-Meier curves for OS stratified based on aberrant laboratory parameters at baseline and early treatment period in patients with non-small cell lung cancer undergoing immunotherapy only for patients with EGFR mutation. Strata 1, 2, 3, and 4 indicate baseline physiological and early treatment period physiological, baseline physiological and early treatment period aberrant, baseline aberrant laboratory physiological and early treatment period physiological, and baseline aberrant laboratory parameter and early treatment period aberrant laboratory parameter respectively. (A) Kaplan-Meier curves of OS stratified based on aberrant NLR at baseline and early treatment period. (B) Kaplan-Meier curves of OS stratified based on aberrant CRP at baseline and early treatment period. (C) Kaplan-Meier curves of OS stratified based on aberrant LDH at baseline and early treatment period. OS, overall survival; NLR, neutrophil-lymphocyte ratio; CRP, C-reactive protein, LDH, lactate dehydrogenase.

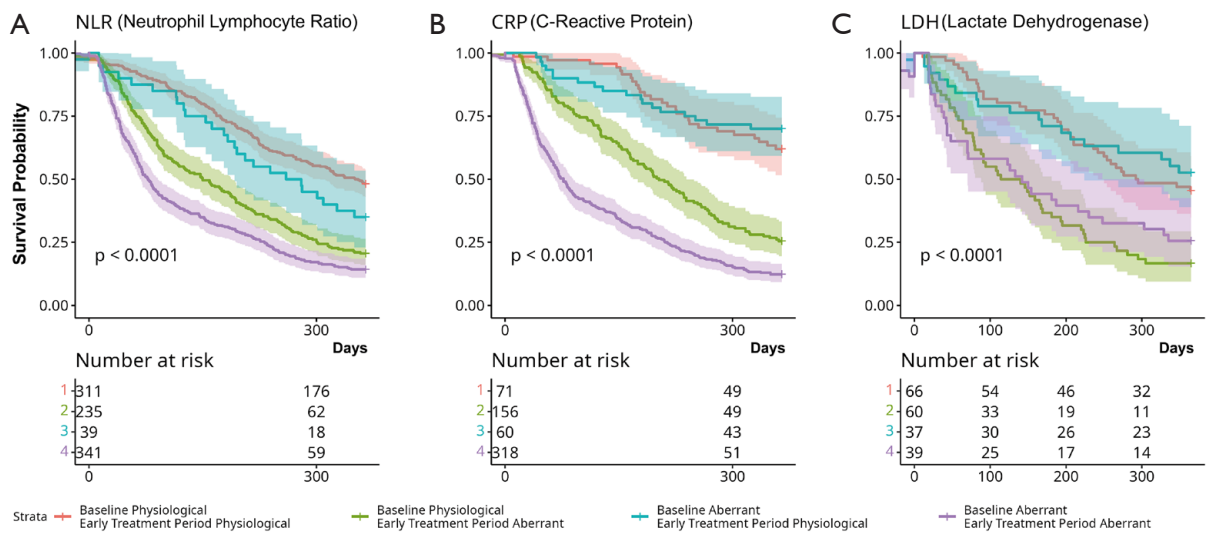

**Figure S3** Kaplan-Meier curves for OS stratified based on aberrant laboratory parameters at baseline and early treatment period in patients with non-small cell lung cancer undergoing immunotherapy only for patients including patients less than one-year survival. (A) Kaplan-Meier curves of OS stratified based on aberrant NLR at baseline and early treatment period. (B) Kaplan-Meier curves of OS stratified based on aberrant CRP at baseline and early treatment period. (C) Kaplan-Meier curves of OS stratified based on aberrant LDH at baseline and early treatment period. OS, overall survival; NLR, neutrophil-lymphocyte ratio; CRP, C-reactive protein, LDH, lactate dehydrogenase. We see that the survival curve is similar to original *Figure 2*. Moreover, the curve difference becomes drastic in LDH.

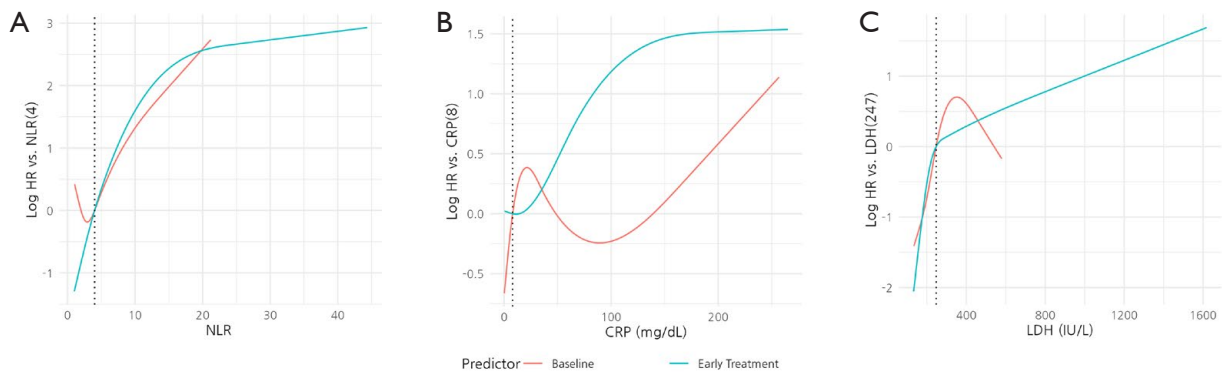

**Figure S4** Cox regression analysis of changes in the hazard ratio with changes in NLR, CRP, and LDH. NLR, neutrophil-lymphocyte ratio; CRP (mg/dL), C-reactive protein; LDH (IU/L), lactate dehydrogenase; HR, hazard ratio.

**Table S1** Comparative analysis of laboratory parameter values between the inflamed and non-inflamed groups at the baseline and early treatment periods

| Parameters                | Baseline       |                    |         | Early treatment period |                    |         |
|---------------------------|----------------|--------------------|---------|------------------------|--------------------|---------|
|                           | Survival group | Non-survival group | P value | Survival group         | Non-survival group | P value |
| NLR; median (IQR)         | 2.6 (1.8–3.9)  | 4.2 (2.7–7.1)      | <0.001  | 3 (2–4)                | 7 (4–14)           | <0.001  |
| CRP (mg/dL); median (IQR) | 7 (2–26)       | 29 (6–70)          | <0.001  | 7 (2–38)               | 64 (29–112)        | <0.001  |
| LDH (IU/L); median (IQR)  | 224 (181–292)  | 216 (188–270)      | 0.9     | 205 (177–240)          | 320 (236–482)      | <0.001  |

NLR, neutrophil-lymphocyte ratio; CRP, C-reactive protein; LDH, lactate dehydrogenase; IQR, interquartile range.

**Table S2** Post-hoc analysis of survival curves

| lab | Stratum 1                         | Stratum 2                         | P value   | Significance <sup>1</sup> |
|-----|-----------------------------------|-----------------------------------|-----------|---------------------------|
| NLR | nlr_baseline_label=1, nlr_label=2 | nlr_baseline_label=1, nlr_label=1 | 0.0000000 | *                         |
| NLR | nlr_baseline_label=2, nlr_label=1 | nlr_baseline_label=1, nlr_label=1 | 0.3608680 |                           |
| NLR | nlr_baseline_label=2, nlr_label=1 | nlr_baseline_label=1, nlr_label=2 | 0.0100008 | *                         |
| NLR | nlr_baseline_label=2, nlr_label=2 | nlr_baseline_label=1, nlr_label=1 | 0.0000000 | *                         |
| NLR | nlr_baseline_label=2, nlr_label=2 | nlr_baseline_label=1, nlr_label=2 | 0.0003801 | *                         |
| NLR | nlr_baseline_label=2, nlr_label=2 | nlr_baseline_label=2, nlr_label=1 | 0.0003799 | *                         |
| CRP | crp_baseline_label=1, crp_label=2 | crp_baseline_label=1, crp_label=1 | 0.0000021 | *                         |
| CRP | crp_baseline_label=2, crp_label=1 | crp_baseline_label=1, crp_label=1 | 0.3554171 |                           |
| CRP | crp_baseline_label=2, crp_label=1 | crp_baseline_label=1, crp_label=2 | 0.0000007 | *                         |
| CRP | crp_baseline_label=2, crp_label=2 | crp_baseline_label=1, crp_label=1 | 0.0000000 | *                         |
| CRP | crp_baseline_label=2, crp_label=2 | crp_baseline_label=1, crp_label=2 | 0.0000007 | *                         |
| CRP | crp_baseline_label=2, crp_label=2 | crp_baseline_label=2, crp_label=1 | 0.0000000 | *                         |
| LDH | ldh_baseline_label=1, ldh_label=2 | ldh_baseline_label=1, ldh_label=1 | 0.0000118 | *                         |
| LDH | ldh_baseline_label=2, ldh_label=1 | ldh_baseline_label=1, ldh_label=1 | 0.5075553 |                           |
| LDH | ldh_baseline_label=2, ldh_label=1 | ldh_baseline_label=1, ldh_label=2 | 0.0009933 | *                         |
| LDH | ldh_baseline_label=2, ldh_label=2 | ldh_baseline_label=1, ldh_label=1 | 0.0059943 | *                         |
| LDH | ldh_baseline_label=2, ldh_label=2 | ldh_baseline_label=1, ldh_label=2 | 0.1977183 |                           |
| LDH | ldh_baseline_label=2, ldh_label=2 | ldh_baseline_label=2, ldh_label=1 | 0.0595699 |                           |

<sup>1</sup>, \*, P<0.05. NLR, neutrophil-lymphocyte ratio; CRP, C-reactive protein; LDH, lactate dehydrogenase

**Table S3** Cox regression analysis with only baseline NLR, CRP, and LDH levels

| Dependent: Surv<br>(observation_days, death) | Subtypes      | Count, n (%) | HR (univariable)           | HR (multivariable)        |
|----------------------------------------------|---------------|--------------|----------------------------|---------------------------|
| Age                                          | Mean (SD)     | 60.0 (10.7)  | 0.99 (0.97–1.00; P=0.071)  | 1.00 (0.98-1.01; P=0.787) |
| Sex                                          | Female        | 160 (26.8)   | 1                          | 1                         |
|                                              | Male          | 437 (73.2)   | 0.85 (0.62–1.17; P=0.322)  | 1.04 (0.71-1.52; P=0.860) |
| BMI                                          | Mean (SD)     | 22.9 (3.2)   | 0.94 (0.90-0.99; P=0.010)  | 0.97 (0.92-1.01; P=0.008) |
| ECOG                                         | Mean (SD)     | 0.7 (0.8)    | 1.71 (1.44-2.02; P<0.001)  | 1.28 (1.07-1.54; P=0.008) |
| Stage                                        | III           | 2 (0.3)      | 1                          | 1                         |
|                                              | IV            | 575 (96.3)   | 0.30 (0.04-2.14; P<0.001)  | 0.29 (0.19-0.44; P<0.001) |
| Line of chemotherapy                         | 1             | 97 (16.2)    | 1                          | 1                         |
|                                              | 2             | 255 (42.7)   | 1.95 (1.20-3.17; P=0.007)  | 1.81 (1.06-3.09; P=0.029) |
|                                              | ≥3            | 201 (33.7)   | 2.59 (1.58-4.25; P<0.001)  | 1.90 (1.08-3.35; P=0.027) |
| nlr_baseline_label                           | Physiological | 355 (59.5)   | 1                          | 1                         |
|                                              | Aberrant      | 242 (40.5)   | 2.73 (2.20–3.40; P<0.001)  | 3.14 (2.07-4.76; P<0.001) |
| crp_baseline_label                           | Physiological | 189 (39.1)   | 1                          | 1                         |
|                                              | Aberrant      | 294 (60.9)   | 2.16 (1.67–2.79; P<0.001)  | 1.42 (0.93-2.16; P=0.107) |
| ldh_baseline_label                           | Physiological | 114 (60.6)   | 1                          | 1                         |
|                                              | Aberrant      | 74 (39.4)    | 0.80 (0.54–1.18; P =0.257) | 0.92 (0.62-1.40; P=0.698) |

NLR, neutrophil-lymphocyte ratio; CRP, C-reactive protein; LDH, lactate dehydrogenase; HR, hazard ratio; BMI, body mass index; ECOG, European Cooperative Oncology Group.

**Table S4** Multivariate analyses of predictors of 2-year and 3-year overall survival using the Cox proportional hazards regression model

| Variables                         | Subtypes      | HR (2-year OS)    |         | HR (3-year OS)   |         |
|-----------------------------------|---------------|-------------------|---------|------------------|---------|
|                                   |               | HR (95% CI)       | P value | HR (95% CI)      | P value |
| Age                               |               | 1.00 (0.97-1.03)  | 0.925   | 1.00 (0.97-1.02) | 0.780   |
| Sex                               | Female        | 1                 |         | 1                |         |
|                                   | Male          | 1.66 (0.78-3.53)  | 0.185   | 1.69 (0.81-3.52) | 0.160   |
| BMI                               | Mean (SD)     | 1.02 (0.93-1.11)  | 0.742   | 1.03 (0.94-1.13) | 0.512   |
| ECOG                              | Mean (SD)     | 1.32 (0.93-1.88)  | 0.117   | 1.37 (0.97-1.93) | 0.074   |
| Stage                             | III           | -                 | -       | -                | -       |
|                                   | IV            | NA                |         | NA               |         |
| Line of Chemotherapy              | 1             | 1                 |         | 1                |         |
|                                   | 2             | 1.18 (0.42-3.32)  | 0.753   | 1.44 (0.52-4.01) | 0.488   |
|                                   | 3             | 1.68 (0.62-4.55)  | 0.310   | 1.69 (0.62-4.61) | 0.302   |
| Baseline NLR levels               | Physiological | 1                 |         | 1                |         |
|                                   | Aberrant      | 1.62 (0.84-3.12)  | 0.151   | 1.55(0.85-2.84)  | 0.155   |
| Early treatment period NLR levels | Physiological | 1                 |         | 1                |         |
|                                   | Aberrant      | 1.43 (0.69-2.96)  | 0.339   | 1.49 (0.73-3.04) | 0.269   |
| Baseline CRP levels               | Physiological | 1                 |         | 1                |         |
|                                   | Aberrant      | 2.28 (1.24-4.18)  | 0.008   | 1.97 (1.11-3.52) | 0.021   |
| Early treatment period CRP levels | Physiological | 1                 |         | 1                |         |
|                                   | Aberrant      | 2.43 (1.14-5.45)  | 0.039   | 2.27 (1.03-5.00) | 0.043   |
| Baseline LDH levels               | Physiological | 1                 |         | 1                |         |
|                                   | Aberrant      | 0.74 (0.39-1.39)  | 0.344   | 0.84 (0.45-1.54) | 0.564   |
| Early treatment period LDH levels | Physiological | 1                 |         | 1                |         |
|                                   | Aberrant      | 5.33 (2.55-11.12) | <0.001  | 4.26 (2.07-8.80) | <0.001  |

HR, hazard ratio; OS, overall survival; BMI, body mass index; ECOG, European Cooperative Oncology Group; NLR, neutrophil-lymphocyte ratio; CRP, C-reactive protein; LDH, lactate dehydrogenase.

**Table S5** Time-varying Cox regression analysis with NLR, CRP, and LDH levels

| Dependent: Survival<br>(observation_days, death) | Subtypes      | Count, n (%) | HR (univariable)          | HR (multivariable)        |
|--------------------------------------------------|---------------|--------------|---------------------------|---------------------------|
| Age                                              | Mean (SD)     | 60.0 (10.7)  | 0.99 (0.97–1.00; P=0.064) | 1.00 (0.98–1.01, P=0.787) |
| Sex                                              | Female        | 160 (26.8)   | 1                         | 1                         |
|                                                  | Male          | 437 (73.2)   | 0.85 (0.62–1.17; P=0.322) | 1.04 (0.71–1.52, P=0.860) |
| BMI                                              | Mean (SD)     | 22.9 (3.2)   | 0.94 (0.90–0.99, P=0.001) | 0.97 (0.92–1.01, P=0.139) |
| ECOG                                             | Mean (SD)     | 0.7 (0.8)    | 1.71 (1.44–2.02, P<0.001) | 1.28 (1.07–1.55, P=0.008) |
| Stage                                            | III           | 2 (0.3)      | 1                         | 1                         |
|                                                  | IV            | 575 (96.3)   | 0.30 (0.04–2.14)          | 0.29 (0.19–0.44, P<0.001) |
| Line of Chemotherapy                             | 1             | 97 (16.2)    | 1                         | 1                         |
|                                                  | 2             | 255 (42.7)   | 1.95 (1.20–3.17, P=0.007) | 1.81 (1.06–3.09, P=0.029) |
|                                                  | ≥3            | 201 (33.7)   | 2.59 (1.58–4.25, P<0.001) | 1.90 (1.08–3.35, P=0.027) |
| NLR                                              | Physiological | 355 (59.5)   | 1                         | 1                         |
|                                                  | Aberrant      | 242 (40.5)   | 4.81 (3.52–6.57; P<0.001) | 2.45 (1.74–3.45, P<0.001) |
| CRP                                              | Physiological | 189 (39.1)   | 1                         | 1                         |
|                                                  | Aberrant      | 294 (60.9)   | 5.59 (3.65–8.58; P<0.001) | 3.37 (2.19–5.17, P<0.001) |
| LDH                                              | Physiological | 114 (60.6)   | 1                         | 1                         |
|                                                  | Aberrant      | 1334 (60.6)  | 5.27 (3.85–7.22; P<0.001) | 3.31 (2.32–4.72, P<0.001) |

NLR, neutrophil-lymphocyte ratio; CRP, C-reactive protein; LDH, lactate dehydrogenase; HR, hazard ratio; BMI, body mass index; ECOG, European Cooperative Oncology Group.

**Table S6** Univariate and multivariate analyses of predictors of overall for patients with EGFR mutation survival using the Cox proportional hazards regression model

| Variables                         | Subtypes      | HR (univariate)   |         | HR (multivariate) |         |
|-----------------------------------|---------------|-------------------|---------|-------------------|---------|
|                                   |               | HR (95% CI)       | P value | HR (95% CI)       | P value |
| Age                               | Mean (SD)     | 1.00 (0.98–1.02)  | 0.854   | 1.01 (0.96–1.06)  | 0.682   |
| Sex                               | Female        | 1                 |         | 1                 | 0.944   |
|                                   | Male          | 0.78 (0.54–1.14)  | 0.089   | 1.05 (0.29–3.79)  |         |
| BMI                               | Mean (SD)     | 0.93 (0.88–0.99)  | 0.017   | 1.11 (0.94–1.30)  | 0.211   |
| ECOG                              | Mean (SD)     | 1.71 (1.43–2.05)  | <0.001  | 1.45 (0.89–2.37)  | 0.134   |
| Stage                             | III           | 1                 |         | -                 | -       |
|                                   | IV            | 0.38 (0.05–2.76)  | 0.341   | -                 | -       |
| Line of Chemotherapy              | 1             | 1                 |         | 1                 |         |
|                                   | 2             | 1.75 (1.04–2.94)  | 0.035   | 8.12 (1.27–51.70) | 0.027   |
|                                   | ≥3            | 2.09 (1.20–3.65)  | 0.009   | 4.64 (0.81–26.50) | 0.085   |
| Baseline NLR levels               | Physiological | 1                 |         | 1                 |         |
|                                   | Aberrant      | 2.22 (1.58–3.13)  | <0.001  | 3.10 (1.08–8.90)  | 0.036   |
| Early treatment period NLR levels | Physiological | 1                 |         | 1                 |         |
|                                   | Aberrant      | 4.72 (3.06–7.28)  | <0.001  | 1.87 (0.52–6.75)  | 0.342   |
| Baseline CRP levels               | Physiological | 1                 |         | 1                 |         |
|                                   | Aberrant      | 1.85 (1.26–2.73)  | 0.002   | 2.22 (0.82–5.98)  | 0.116   |
| Early treatment period CRP levels | Physiological | 1                 |         | 1                 |         |
|                                   | Aberrant      | 6.42 (3.35–12.31) | <0.001  | 1.27 (0.37–4.43)  | 0.705   |
| Baseline LDH levels               | Physiological | 1                 |         | 1                 |         |
|                                   | Aberrant      | 1.00 (0.54–1.85)  | 0.993   | 0.53 (0.18–1.55)  | 0.245   |
| Early treatment period LDH levels | Physiological | 1                 |         | 1                 |         |
|                                   | Aberrant      | 4.96 (3.09–7.94)  | <0.001  | 4.26 (1.41–12.81) | 0.010   |

HR, hazard ratio; BMI, body mass index; ECOG, European Cooperative Oncology Group; NLR, neutrophil-lymphocyte ratio; CRP, C-reactive protein; LDH, lactate dehydrogenase.

**Table S7** Baseline characteristics of the identified patients including patients with less than one-year observation window

| Characteristics                 | Total (N=970) | Survival group (N=265) | Non-survival (N=705) | P value |
|---------------------------------|---------------|------------------------|----------------------|---------|
| Age (years); mean (SD)          | 61.7 (10.3)   | 62.0 (10.0)            | 61.6 (10.4)          | 0.617   |
| Sex; n (%)                      |               |                        |                      | 0.091   |
| Male                            | 699 (72.1)    | 202 (76.2)             | 497 (70.5)           |         |
| Female                          | 271 (27.9)    | 63 (23.8)              | 208 (29.5)           |         |
| BMI; mean (SD)                  | 23.0 (3.8)    | 23.4 (3.2)             | 22.9 (4.0)           | 0.033   |
| ECOG; mean (SD)                 | 0.6 (0.8)     | 0.4 (0.6)              | 0.6 (0.8)            | <0.001  |
| Stage                           |               |                        |                      |         |
| III                             | 2 (0.3)       | 0 (0.0)                | 2 (0.6)              | 0.937   |
| IV                              | 937 (96.6)    | 258 (97.4)             | 679 (96.3)           |         |
| Line of chemotherapy            |               |                        |                      |         |
| 1                               | 143 (14.7)    | 66 (24.9)              | 77 (10.9)            | <0.001  |
| 2                               | 425 (43.8)    | 120 (45.3)             | 305 (43.3)           |         |
| ≥3                              | 336 (34.6)    | 71 (26.8)              | 265 (37.6)           |         |
| Immunotherapy type; n (%)       |               |                        |                      | <0.001  |
| Atezolizumab                    | 372 (38.4)    | 63 (23.8)              | 309 (43.8)           |         |
| Pembrolizumab                   | 292 (30.1)    | 118 (44.5)             | 174 (24.7)           |         |
| Nivolumab                       | 306 (31.5)    | 84 (31.7)              | 222 (31.5)           |         |
| Histological type; n (%)        |               |                        |                      | 0.198   |
| Adenocarcinoma                  | 687 (70.8)    | 185 (69.8)             | 502 (71.2)           |         |
| Squamous cell carcinoma         | 255 (26.3)    | 76 (28.7)              | 179 (25.4)           |         |
| Others                          | 28 (2.9)      | 4 (1.5)                | 24 (3.4)             |         |
| EGFR status; n (%)              |               |                        |                      |         |
| Wild-type                       | 403 (41.5)    | 119 (44.9)             | 284 (40.3)           | 0.009   |
| Mutant                          | 127 (13.1)    | 22 (8.3)               | 105 (14.9)           |         |
| Unknown                         | 440 (45.4)    | 124 (46.8)             | 316 (44.8)           |         |
| PD-L1 expression (%); mean (SD) | 32.7 (38.3)   | 47.0 (40.8)            | 27.1 (35.9)          | <0.001  |
| Observation (days); mean (SD)   | 189.5 (141.3) | 365 (0.0)              | 123.6 (107.4)        | <0.001  |

SD, standard deviation; BMI, body mass index; ECOG, European Cooperative Oncology Group; EGFR, epidermal growth factor receptor; PD-L1, programmed cell death ligand 1.



**Table S8** Univariate and multivariate analyses of predictors of overall for patients including patients with less than one-year observation window using the Cox proportional hazards regression model

| Variables                         | Subtypes      | HR (univariate)  |         | HR (multivariate) |         |
|-----------------------------------|---------------|------------------|---------|-------------------|---------|
|                                   |               | HR (95% CI)      | P value | HR (95% CI)       | P value |
| Age                               | Mean (SD)     | 1.00 (0.99–1.01) | 0.674   | 1.00 (0.98–1.03)  | 0.705   |
| Sex                               | Female        | -                |         | -                 |         |
|                                   | Male          | 0.85 (0.72–1.00) | 0.048   | 0.97 (0.56–1.70)  | 0.927   |
| BMI                               | Mean (SD)     | 0.96 (0.92–0.98) | 0.001   | 1.02 (0.98–1.06)  | 0.264   |
| ECOG                              | Mean (SD)     | 1.41 (1.28–1.54) | <0.001  | 1.33 (1.06–1.68)  | 0.016   |
| Stage                             | III           | 1                |         | 1                 |         |
|                                   | IV            | 0.51 (0.13–2.05) | 0.343   | NA                |         |
| Line of Chemotherapy              | 1             | 1                |         | 1                 |         |
|                                   | 2             | 1.61 (1.25–2.07) | <0.001  | 2.03 (0.92–4.50)  | 0.080   |
|                                   | ≥3            | 1.99 (1.55–2.57) | <0.001  | 2.23 (0.97–5.10)  | 0.059   |
| Baseline NLR levels               | Physiological | 1                |         | 1                 |         |
|                                   | Aberrant      | 2.03 (1.75–2.36) | <0.001  | 1.64 (0.99–2.70)  | 0.053   |
| Early treatment period NLR levels | Physiological | 1                |         | 1                 |         |
|                                   | Aberrant      | 2.63 (2.22–3.11) | <0.001  | 1.46 (0.86–2.46)  | 0.159   |
| Baseline CRP levels               | Physiological | 1                |         | 1                 |         |
|                                   | Aberrant      | 1.70 (1.43–2.02) | <0.001  | 1.57 (1.00–2.49)  | 0.052   |
| Early treatment period CRP levels | Physiological | 1                |         | 1                 |         |
|                                   | Aberrant      | 3.95 (3.04–5.12) | <0.001  | 3.40 (1.79–6.47)  | <0.001  |
| Baseline LDH levels               | Physiological | 1                |         | 1                 |         |
|                                   | Aberrant      | 0.86 (0.65–1.14) | 0.301   | 0.80 (0.51–1.26)  | 0.332   |
| Early treatment period LDH levels | Physiological | 1                |         | 1                 |         |
|                                   | Aberrant      | 2.87 (2.37–3.47) | <0.001  | 2.55 (1.58–4.13)  | <0.001  |

HR, hazard ratio; BMI, body mass index; ECOG, European Cooperative Oncology Group; NLR, neutrophil-lymphocyte ratio; CRP, C-reactive protein; LDH, lactate dehydrogenase.
